# Supplementary material
Source: Elsevier journal article supplement (https://www.sciencedirect.com/science/article/pii/S0213911117300663)
Supplement: mmc1 [file S0213911117300663:mmc1.docx]

**Anexo: Versión en español del European Quality Instrument for Health Promotion**

**EQUIPH_es**[[1]](#footnote-2)

Conteste: Sí, No o En parte.

1. **PRINCIPIOS DE PROMOCIÓN DE LA SALUD**

El proyecto abarca los principios de promoción de la salud, incluyendo un enfoque positivo e integral de la salud, la atención a los determinantes de la salud, la participación, el empoderamiento, la equidad y la igualdad.

Los siguientes indicadores le ayudarán a evaluar estos principios:

1. ¿Responde el proyecto al modelo de determinantes de la salud, incluyendo la promoción de las habilidades y capacidades de las personas y/o las condiciones sociales y ambientales que influyen en la salud?

O Sí O No O En parte

2. ¿El proyecto está integrado dentro de un enfoque integral de promoción de la salud, según se detalla en un plan de políticas (local, regional, nacional o institucional)?

O Sí O No O En parte

3. ¿Funciona el proyecto de acuerdo a los principios basados en la evidencia?

O Sí O No O En parte

4. ¿El proyecto contempla o considera el empoderamiento de las personas participantes?

O Sí O No O En parte

5. ¿El proyecto contempla las desigualdades en salud y la equidad?

O Sí O No O En parte

6. ¿Es objetivo del proyecto crear pertenencia (*vínculos*) entre las partes o personas interesadas?

O Sí O No O En parte

1. **DESARROLLO E IMPLEMENTACIÓN DEL PROYECTO**
2. **Análisis**

El proyecto se basa en un análisis sistemático de los problemas de salud y sus determinantes y del contexto en el que se llevará a cabo. Los siguientes indicadores le ayudarán a evaluar la calidad de este análisis:

1. ¿Existe evidencia del problema de salud y su impacto en la calidad de vida?

- ¿Se han recogido datos empíricos sobre la naturaleza, el tamaño y la distribución del problema?

O Sí O No O En parte

- ¿Se ha efectuado una revisión para reunir la evidencia existente en relación con el problema, o se prevé una revisión explícita en el plan del proyecto?

O Sí O No O En parte

- ¿Se ha recopilado información sobre el problema a través de la consulta del grupo beneficiario o destinatario[[2]](#footnote-3), la comunidad o de otras partes interesadas?

O Sí O No O En parte

2. ¿Existe evidencia de los factores de comportamiento y contextuales que influyen en el problema de salud?

- ¿Se ha hecho uso de modelos teóricos que explican los vínculos entre los problemas de salud, los comportamientos de riesgo y/o factores ambientales?

O Sí O No O En parte

- ¿Se ha examinado la importancia de cada factor determinante para el grupo beneficiario o destinatario?

O Sí O No O En parte

3. ¿Existe evidencia del contexto en el que se llevará a cabo el proyecto?

- ¿Está claro en qué contexto se llevará a cabo el proyecto?

O Sí O No O En parte

- ¿Se han examinado otros programas que tienen un impacto en el comportamiento o el contexto?

O Sí O No O En parte

- ¿Se han examinado los factores sociales, culturales y políticos que influyen en el éxito del proyecto?

O Sí O No O En parte

1. **Objetivos**

Los fines y objetivos del proyecto deben ser claramente definidos.

Los siguientes indicadores le ayudarán a evaluar la idoneidad de los fines y objetivos:

1. ¿Existe un documento que especifique por escrito las metas y objetivos del proyecto?

O Sí O No O En parte

2. ¿Existe una distinción entre los objetivos a corto plazo (inmediato), medio plazo (intermedio) y largo plazo?

O Sí O No O En parte

3. ¿Se cumple la formulación de los objetivos SMART?

- S: Específicos (¿Se especifica el grupo beneficiario y los factores que deben cambiar?)

O Sí O No O En parte

- M: Medibles (¿Están escritos en un formato mensurable?, por ejemplo: Magnitud de los efectos, etc.)

O Sí O No O En parte

- A: ¿Son aceptables para el grupo beneficiario?

O Sí O No O En parte

- R: Realistas (¿Son factibles dado el tiempo disponible, recursos económicos, recursos humanos…?)

O Sí O No O En parte

- T: Tiempo-estimado (¿Especifican el plazo en el que deben ser alcanzados los objetivos?)

O Sí O No O En parte

4. ¿Coinciden los objetivos con el análisis del problema y los factores determinantes?

O Sí O No O En parte

1. **Población participante**

En el proyecto está claramente definido el grupo de personas con las que se tiene la intención de actuar.

Los siguientes indicadores le ayudarán a evaluar la adecuación de la estrategia:

1. ¿Se han identificado las características demográficas relevantes de la población o participante o grupo beneficiario?

O Sí O No O En parte

2. Respecto a las necesidades prioritarias, ¿se han identificado los deseos, las necesidades y las normas sociales de la población participante?

O Sí O No O En parte

3. ¿Se ha segmentado la población con respecto a la fase de su motivación y posibilidades de cambio?

O Sí O No O En parte

4. ¿Se ha establecido el tamaño de la población participante (número de sujetos)?

O Sí O No O En parte

5. ¿Está claro cómo se alcanzará a la población participante?

O Sí O No O En parte

1. **Intervención**

Las estrategias y métodos para que la intervención sea efectiva están claramente definidos en el proyecto.

Los siguientes indicadores le ayudarán a evaluar la adecuación de las estrategias y métodos:

1. ¿Se ha realizado una especificación de los mecanismos que deberían provocar los cambios previstos?

O Sí O No O En parte

2. ¿Es la intervención suficientemente integral (¿utiliza una combinación de estrategias para alcanzar los objetivos?)?

O Sí O No O En parte

3. ¿Se ha demostrado la eficacia de los métodos de intervención?

O Sí O No O En parte

4. ¿La intervención se ha diseñado teniendo en cuenta la opinión de socios o aliados?

O Sí O No O En parte

5. ¿La intervención se ha diseñado teniendo en cuenta la opinión de las distintas partes interesadas?

O Sí O No O En parte

6. ¿La intervención se ha diseñado teniendo en cuenta la opinión de la población participante?

O Sí O No O En parte

7. ¿Son los métodos de intervención adecuados para la población participante?

O Sí O No O En parte

8. ¿Es el contenido de la intervención compatible con…:

•… la cultura, conocimientos, opiniones, costumbres y roles de la población?

O Sí O No O En parte

•… el contexto de la intervención?

O Sí O No O En parte

9. ¿Ha sido la intervención eficaz en el logro de los resultados esperados con una población similar?

O Sí O No O En parte

10. ¿Proporciona la intervención un valor complementario o potencia el efecto de las intervenciones existentes?

O Sí O No O En parte

11. ¿El proyecto ha sido previamente probado realizando un pre-test en una población similar, o se prevé realizar un pre-test en el plan del proyecto?

O Sí O No O En parte

1. **Estrategia de ejecución**

Hay una clara descripción de la forma en que la intervención se llevará a cabo.

Los siguientes indicadores le ayudarán a evaluar la suficiencia de la descripción de la estrategia de ejecución:

1. ¿Se ha elegido un modo particular de implementación?

O Sí O No O En parte

2. ¿Se ha traducido esta elección en un plan de implementación?

O Sí O No O En parte

3. ¿Los socios, población diana y/u otros representantes participarán en la ejecución de los proyectos?

O Sí O No O En parte

4. ¿Están claros, para aquellos que estarán involucrados en la ejecución, los elementos de la intervención esenciales que deben mantenerse sin ninguna adaptación?

O Sí O No O En parte

5. ¿Está claro cómo se supervisará la implementación?

O Sí O No O En parte

6. ¿El proyecto estará documentado de forma que permitirá una transferencia de la experiencia y los conocimientos relacionados con el “cómo” se ha llevado a cabo (*know-how*) a otros proyectos?

O Sí O No O En parte

1. **Evaluación**

Los efectos de evaluación (efecto) y la calidad (evaluación del proceso) de la intervención serán evaluados.

Los siguientes indicadores le ayudarán a evaluar la adecuación de la evaluación de la intervención:

1. ¿Existe un plan de evaluación?

O Sí O No O En parte

2. ¿El plan de evaluación proyecta claramente:

- …el propósito de la evaluación?

O Sí O No O En parte

- …las preguntas de evaluación?

O Sí O No O En parte

- …el diseño, el método y el calendario de la evaluación?

O Sí O No O En parte

- …las tareas, funciones y responsabilidades para la evaluación (incluyendo la recopilación de datos, análisis y presentación de informes)?

O Sí O No O En parte

2. ¿Las preguntas de evaluación se ajustan a los objetivos, el contexto y las expectativas de la población participante y las partes interesadas?

O Sí O No O En parte

3. Se llevará a cabo una evaluación del proceso que incluya estas cuestiones:

• ¿Las actividades se realizan de acuerdo con el plan?

O Sí O No O En parte

• ¿Se tiene en cuenta la opinión de los usuarios en relación con las actividades y los materiales?

O Sí O No O En parte

• ¿Están reflejados los obstáculos y dificultades que se han encontrado durante el proceso de implementación?

O Sí O No O En parte

• ¿Están reflejadas las sugerencias de mejora?

O Sí O No O En parte

4. Se lleva a cabo una evaluación de la efectividad que incluye estas cuestiones:

• La recopilación de datos de referencia

O Sí O No O En parte

• La elección de los criterios e indicadores de efecto

O Sí O No O En parte

• Medición de corto plazo, medio y largo plazo de los objetivos

O Sí O No O En parte

• Exclusión de explicaciones alternativas de los posibles efectos

O Sí O No O En parte

• Atribución causal del efecto de la intervención

O Sí O No O En parte

• Evaluación de la rentabilidad del proyecto

O Sí O No O En parte

5. ¿El diseño y los métodos de recolección de datos de evaluación son los adecuados para las preguntas de evaluación, presupuesto y cronograma de informes?

O Sí O No O En parte

6. ¿La información derivada de la evaluación se difundirá y se compartirá con todos los interesados y con el grupo beneficiario?

O Sí O No O En parte

1. **GESTIÓN DEL PROYECTO**
2. **Liderazgo**

Una persona ha sido designada como responsable principal con capacidad de gestionar el proyecto.

Los siguientes indicadores le ayudarán a evaluar el liderazgo del proyecto:

1. ¿Se ha hecho una clara división de responsabilidades y tareas entre el/la coordinador/a del proyecto y otros tomadores de decisiones?

O Sí O No O En parte

2. ¿El/la coordinador/a del proyecto cualificado para las tareas o está capacitado/a para adquirir las habilidades necesarias?

O Sí O No O En parte

3. ¿El/la coordinador/a del proyecto tiene autoridad suficiente para alcanzar los objetivos del proyecto?

O Sí O No O En parte

4. ¿Es el/la coordinador/a de proyecto capaz de utilizar los recursos disponibles de una manera flexible?

O Sí O No O En parte

1. **Planificación y documentación**

El plan de trabajo y la organización del proyecto están claramente establecidos.

Los siguientes indicadores le ayudarán a evaluar la adecuación de la planificación y documentación del proyecto:

1. ¿El plan del proyecto está lógicamente estructurado y claramente escrito?

O Sí O No O En parte

2. ¿El plan de proyecto especifica los momentos de toma de decisiones importantes?

O Sí O No O En parte

3. ¿Está descrito claramente en el plan de trabajo cómo se realizarán las actividades?

O Sí O No O En parte

4. ¿Están claramente definidos y documentados los aspectos organizativos de la intervención?

O Sí O No O En parte

5. ¿Hay un plazo realista para el proyecto?

O Sí O No O En parte

1. **Capacidad y recursos**

¿Los conocimientos y recursos disponibles son los necesarios para ejecutar el proyecto con éxito?

Los siguientes indicadores le ayudarán a evaluar la adecuación de la capacidad y los recursos para el proyecto:

1. ¿El proyecto dispone de un personal competente?

• ¿Existe un perfil de las competencias y conocimientos necesarios para cada fase del proyecto?

O Sí O No O En parte

• ¿La cualificación y capacidades de los miembros del personal están adaptados a las necesidades del proyecto?

O Sí O No O En parte

• ¿Se han especificado posibilidades para mejorar las habilidades a través de la supervisión, intervisión y/o formación?

O Sí O No O En parte

2. ¿El proyecto dispone de unos recursos financieros determinados?

• ¿Existe un plan de presupuesto para el proyecto?

O Sí O No O En parte

• ¿Se han identificado las fuentes de financiación?

O Sí O No O En parte

• ¿El presupuesto es realista?

O Sí O No O En parte

3. ¿El proyecto dispone de los materiales necesarios para llevar a cabo el programa. (Necesidades administrativas: teléfonos, fax, ordenadores, internet, etc.)?

O Sí O No O En parte

4. ¿Los recursos no materiales para el proyecto están claramente identificados y determinados?

• ¿Se ha realizado una evaluación de las habilidades y capacidades disponibles de la población diana?

O Sí O No O En parte

• ¿Se han identificado las posibilidades de trabajo en red a nivel local?

O Sí O No O En parte

• ¿Está claro cómo se movilizarán las capacidades locales, como se mejorarán o ampliarán y los “activos” o capacidades locales?

O Sí O No O En parte

1. **Participación y compromiso**

Se refleja el compromiso por parte de los involucrados en el proyecto.

Los siguientes indicadores le ayudarán a determinar el nivel de participación y compromiso:

1. ¿Se especifica claramente cómo se van a conseguir la colaboración y las sinergias (el trabajo en red)?

O Sí O No O En parte

2. ¿Se han identificado qué socios internos y externos son necesarios para proporcionar apoyo y compromiso adecuado en cada etapa del proyecto?

O Sí O No O En parte

3. ¿Los métodos de trabajo que se utilizarán, tendrán en cuenta las diferentes perspectivas y contribuciones de las distintas personas o agentes implicados?

O Sí O No O En parte

4. ¿Está prevista la participación en la organización del proyecto (por ejemplo la creación de un comité asesor para la dirección)?

O Sí O No O En parte

• ¿Se han identificado los posibles oponentes y obstáculos para la realización del proyecto?

O Sí O No O En parte

• ¿La participación de socios internos y externos será formalizada a través de acuerdos?

O Sí O No O En parte

1. **Comunicación**

En el proyecto se refleja la forma en la que se informará a todos los participantes (población diana y partes interesadas).

Los siguientes indicadores nos ayudarán a evaluar la adecuación de la comunicación:

1. ¿Se ha hecho un plan de comunicación?

O Sí O No O En parte

2. ¿Es el plan de comunicación el adecuado para el contenido de la comunicación?

O Sí O No O En parte

3. ¿Está el estilo de comunicación del plan adaptado al grupo beneficiario?

O Sí O No O En parte

4. ¿Se han identificado los diferentes canales de comunicación en el plan de comunicación?

O Sí O No O En parte

5. ¿La información dirigida a la comunidad, población diana y partes interesadas es clara y transparente?

O Sí O No O En parte

1. **SOSTENIBILIDAD**

La continuación del proyecto está asegurada.

Los siguientes indicadores le ayudarán a evaluar la continuación del proyecto:

1. ¿Se ha realizado una evaluación de la sostenibilidad del proyecto?

O Sí O No O En parte

2. ¿Se han revisado los fines, objetivos y resultados del proyecto desde la perspectiva de la continuidad?

O Sí O No O En parte

3. ¿Están claramente especificados los beneficios del proyecto para la población participante y la comunidad?

O Sí O No O En parte

4. ¿Se han identificado una o más organizaciones que podrían continuar el proyecto?

O Sí O No O En parte

1. Traducido por Rebeca Cerdá, Pilar López-Sánchez, Viola Cassetti y Joan J. Paredes-Carbonell [↑](#footnote-ref-2)
2. Nota de la traducción: preferimos utilizar “población participante” o “grupo beneficiario o destinatario” al término población o grupo objetivo o diana. [↑](#footnote-ref-3)
